# Supplementary material for: A Three-Protein Panel to Support the Diagnosis of Sepsis in Children
Source: MDPI journal article supplement (doi:10.3390/jcm11061563), 2022-03-12
Supplement: s1 [file s1]

## Supplementary material

Table S1. Proteins identified by proteomics

| ACCESSION   | ANOVA<br>(P) | MAX<br>FOLD<br>CHANGE | HIGHEST<br>MEAN<br>CONDITION | DESCRIPTION                                                                                     |
|-------------|--------------|-----------------------|------------------------------|-------------------------------------------------------------------------------------------------|
| LBP_HUMAN   | 2,60E-09     | 29,31263              | Sepsis                       | Lipopolysaccharide-binding protein OS=Homo sapiens GN=LBP PE=1 SV=3                             |
| A2GL_HUMAN  | 3,20E-08     | 4,426432              | Sepsis                       | Leucine-rich alpha-2-glycoprotein OS=Homo sapiens GN=LRG1 PE=1 SV=2                             |
| CRP_HUMAN   | 8,14E-08     | 30,41798              | Sepsis                       | C-reactive protein OS=Homo sapiens GN=CRP PE=1 SV=1                                             |
| ZBT10_HUMAN | 2,53E-07     | 56,29807              | Sepsis                       | Zinc finger and BTB domain-containing protein 10 OS=Homo sapiens GN=ZBTB10 PE=1 SV=2            |
| SAA2_HUMAN  | 7,47E-07     | 84,27766              | Sepsis                       | Serum amyloid A-2 protein OS=Homo sapiens GN=SAA2 PE=1 SV=1                                     |
| IPSP_HUMAN  | 1,21E-06     | 5,010882              | Control                      | Plasma serine protease inhibitor OS=Homo sapiens GN=SERPINA5 PE=1 SV=3                          |
| SAM9L_HUMAN | 1,56E-06     | 4,739466              | Sepsis                       | Sterile alpha motif domain-containing protein 9-like OS=Homo sapiens GN=SAMD9L PE=1 SV=2        |
| FINC_HUMAN  | 9,13E-06     | 8,758802              | Control                      | Fibronectin OS=Homo sapiens GN=FN1 PE=1 SV=4                                                    |
| HBB_HUMAN   | 1,11E-05     | 25,27837              | Sepsis                       | Hemoglobin subunit beta OS=Homo sapiens GN=HBB PE=1 SV=2                                        |
| AACT_HUMAN  | 1,88E-05     | 5,283651              | Sepsis                       | Alpha-1-antichymotrypsin OS=Homo sapiens GN=SERPINA3 PE=1 SV=2                                  |
| VASN_HUMAN  | 2,50E-05     | 2,193836              | Sepsis                       | Vasorin OS=Homo sapiens GN=VASN PE=1 SV=1                                                       |
| SAA1_HUMAN  | 2,97E-05     | 76,09709              | Sepsis                       | Serum amyloid A-1 protein OS=Homo sapiens GN=SAA1 PE=1 SV=1                                     |
| HBA_HUMAN   | 3,78E-05     | 16,39969              | Sepsis                       | Hemoglobin subunit alpha OS=Homo sapiens GN=HBA1 PE=1 SV=2                                      |
| CATA_HUMAN  | 5,92E-05     | 7,286451              | Sepsis                       | Catalase OS=Homo sapiens GN=CAT PE=1 SV=3                                                       |
| HABP2_HUMAN | 0,000159     | 2,179075              | Control                      | Hyaluronan-binding protein 2 OS=Homo sapiens GN=HABP2 PE=1 SV=1                                 |
| TTHY_HUMAN  | 0,000215     | 2,365905              | Control                      | Transthyretin OS=Homo sapiens GN=TTR PE=1 SV=1                                                  |
| CAH1_HUMAN  | 0,000234     | 8,950114              | Sepsis                       | Carbonic anhydrase 1 OS=Homo sapiens GN=CA1 PE=1 SV=2                                           |
| EZRI_HUMAN  | 0,000299     | 13,5159               | Sepsis                       | Ezrin OS=Homo sapiens GN=EZR PE=1 SV=4                                                          |
| CFAB_HUMAN  | 0,000336     | 2,048895              | Sepsis                       | Complement factor B OS=Homo sapiens GN=CFB PE=1 SV=2                                            |
| HBG1_HUMAN  | 0,00038      | 10,34474              | Sepsis                       | Hemoglobin subunit gamma-1 OS=Homo sapiens GN=HBG1 PE=1 SV=2                                    |
| LYAM1_HUMAN | 0,0004       | 2,675523              | Sepsis                       | L-selectin OS=Homo sapiens GN=SELL PE=1 SV=2                                                    |
| NGAL_HUMAN  | 0,000557     | 7,169257              | Sepsis                       | Neutrophil gelatinase-associated lipocalin OS=Homo sapiens GN=LCN2 PE=1 SV=2                    |
| BGH3_HUMAN  | 0,000634     | 3,273124              | Sepsis                       | Transforming growth factor-beta-induced protein ig-h3 OS=Homo sapiens GN=TGFBI PE=1 SV=1        |
| B2MG_HUMAN  | 0,000753     | 3,486171              | Sepsis                       | Beta-2-microglobulin OS=Homo sapiens GN=B2M PE=1 SV=1                                           |
| KAIN_HUMAN  | 0,000763     | 1,80505               | Control                      | Kallistatin OS=Homo sapiens GN=SERPINA4 PE=1 SV=3                                               |
| FA12_HUMAN  | 0,00083      | 3,237085              | Control                      | Coagulation factor XII OS=Homo sapiens GN=F12 PE=1 SV=3                                         |
| CD14_HUMAN  | 0,000871     | 2,784851              | Sepsis                       | Monocyte differentiation antigen CD14 OS=Homo sapiens GN=CD14 PE=1 SV=2                         |
| FIBG_HUMAN  | 0,000995     | 5,317049              | Sepsis                       | Fibrinogen gamma chain OS=Homo sapiens GN=FGG PE=1 SV=3                                         |
| TRFL_HUMAN  | 0,001181     | 9,346009              | Sepsis                       | Lactotransferrin OS=Homo sapiens GN=LTF PE=1 SV=6                                               |
| ITIH3_HUMAN | 0,001239     | 2,192084              | Sepsis                       | Inter-alpha-trypsin inhibitor heavy chain H3 OS=Homo sapiens GN=ITIH3 PE=1 SV=2                 |
| SAP_HUMAN   | 0,001275     | 15,28159              | Sepsis                       | Prosaposin OS=Homo sapiens GN=PSAP PE=1 SV=2                                                    |
| GPX3_HUMAN  | 0,001346     | 1,841343              | Sepsis                       | Glutathione peroxidase 3 OS=Homo sapiens GN=GPX3 PE=1 SV=2                                      |
| DEF1_HUMAN  | 0,001388     | 3,067017              | Sepsis                       | Neutrophil defensin 1 OS=Homo sapiens GN=DEFA1 PE=1 SV=1                                        |
| PRDX2_HUMAN | 0,00188      | 7,267809              | Sepsis                       | Peroxisredoxin-2 OS=Homo sapiens GN=PRDX2 PE=1 SV=5                                             |
| LIRA1_HUMAN | 0,001982     | 19,79422              | Sepsis                       | Leukocyte immunoglobulin-like receptor subfamily A member 1 OS=Homo sapiens GN=LILRA1 PE=2 SV=1 |
| A1AG1_HUMAN | 0,002063     | 2,94118               | Sepsis                       | Alpha-1-acid glycoprotein 1 OS=Homo sapiens GN=ORM1 PE=1 SV=1                                   |
| FIBB_HUMAN  | 0,002142     | 7,926361              | Sepsis                       | Fibrinogen beta chain OS=Homo sapiens GN=FGB PE=1 SV=2                                          |

|                    |          |          |         |                                                                                       |
|--------------------|----------|----------|---------|---------------------------------------------------------------------------------------|
| <b>APOA4_HUMAN</b> | 0,002251 | 3,062538 | Control | Apolipoprotein A-IV OS=Homo sapiens GN=APOA4 PE=1 SV=3                                |
| <b>RET4_HUMAN</b>  | 0,002343 | 2,804231 | Control | Retinol-binding protein 4 OS=Homo sapiens GN=RBP4 PE=1 SV=3                           |
| <b>CSF1R_HUMAN</b> | 0,002473 | 2,273012 | Sepsis  | Macrophage colony-stimulating factor 1 receptor OS=Homo sapiens GN=CSF1R PE=1 SV=2    |
| <b>PLMN_HUMAN</b>  | 0,002495 | 2,124858 | Control | Plasminogen OS=Homo sapiens GN=PLG PE=1 SV=2                                          |
| <b>ITIH2_HUMAN</b> | 0,003087 | 1,890549 | Control | Inter-alpha-trypsin inhibitor heavy chain H2 OS=Homo sapiens GN=ITIH2 PE=1 SV=2       |
| <b>MA1A1_HUMAN</b> | 0,003474 | 17,1192  | Sepsis  | Mannosyl-oligosaccharide 1,2-alpha-mannosidase IA OS=Homo sapiens GN=MAN1A1 PE=1 SV=3 |
| <b>G3P_HUMAN</b>   | 0,004421 | 3,421498 | Sepsis  | Glyceraldehyde-3-phosphate dehydrogenase OS=Homo sapiens GN=GAPDH PE=1 SV=3           |
| <b>SHBG_HUMAN</b>  | 0,004819 | 2,27438  | Sepsis  | Sex hormone-binding globulin OS=Homo sapiens GN=SHBG PE=1 SV=2                        |
| <b>SPRC_HUMAN</b>  | 0,005756 | 2,146585 | Control | SPARC OS=Homo sapiens GN=SPARC PE=1 SV=1                                              |
| <b>HGFL_HUMAN</b>  | 0,006618 | 1,904603 | Sepsis  | Hepatocyte growth factor-like protein OS=Homo sapiens GN=MST1 PE=1 SV=2               |
| <b>APOH_HUMAN</b>  | 0,006849 | 1,769107 | Control | Beta-2-glycoprotein 1 OS=Homo sapiens GN=APOH PE=1 SV=3                               |
| <b>REG1A_HUMAN</b> | 0,007276 | 6,428111 | Sepsis  | Lithostathine-1-alpha OS=Homo sapiens GN=REG1A PE=1 SV=3                              |
| <b>FETUB_HUMAN</b> | 0,007872 | 2,061183 | Control | Fetuin-B OS=Homo sapiens GN=FETUB PE=1 SV=2                                           |
| <b>HPT_HUMAN</b>   | 0,008058 | 9,390239 | Sepsis  | Haptoglobin OS=Homo sapiens GN=HP PE=1 SV=1                                           |
| <b>PTX3_HUMAN</b>  | 0,008478 | 8,831504 | Sepsis  | Pentraxin-related protein PTX3 OS=Homo sapiens GN=PTX3 PE=1 SV=3                      |
| <b>6PGD_HUMAN</b>  | 0,008556 | 3,129853 | Sepsis  | 6-phosphogluconate dehydrogenase, decarboxylating OS=Homo sapiens GN=PGD PE=1 SV=3    |
| <b>CLUS_HUMAN</b>  | 0,008586 | 1,578308 | Control | Clusterin OS=Homo sapiens GN=CLU PE=1 SV=1                                            |
| <b>AMBP_HUMAN</b>  | 0,010741 | 1,541423 | Control | Protein AMBP OS=Homo sapiens GN=AMBP PE=1 SV=1                                        |
| <b>ZPI_HUMAN</b>   | 0,011272 | 2,79504  | Sepsis  | Protein Z-dependent protease inhibitor OS=Homo sapiens GN=SERPINA10 PE=1 SV=1         |
| <b>TRFE_HUMAN</b>  | 0,011976 | 1,689484 | Control | Serotransferrin OS=Homo sapiens GN=TF PE=1 SV=3                                       |
| <b>KLKB1_HUMAN</b> | 0,011997 | 1,515679 | Control | Plasma kallikrein OS=Homo sapiens GN=KLKB1 PE=1 SV=1                                  |
| <b>RIMS1_HUMAN</b> | 0,013036 | 1,840342 | Control | Regulating synaptic membrane exocytosis protein 1 OS=Homo sapiens GN=RIMS1 PE=1 SV=1  |
| <b>CO9_HUMAN</b>   | 0,015303 | 1,736343 | Sepsis  | Complement component C9 OS=Homo sapiens GN=C9 PE=1 SV=2                               |
| <b>APOA1_HUMAN</b> | 0,016232 | 1,736786 | Control | Apolipoprotein A-I OS=Homo sapiens GN=APOA1 PE=1 SV=1                                 |
| <b>COR1A_HUMAN</b> | 0,016806 | 4,218491 | Sepsis  | Coronin-1A OS=Homo sapiens GN=CORO1A PE=1 SV=4                                        |
| <b>PLSL_HUMAN</b>  | 0,016815 | 2,812893 | Sepsis  | Plastin-2 OS=Homo sapiens GN=LCP1 PE=1 SV=6                                           |
| <b>VTNC_HUMAN</b>  | 0,017155 | 1,495985 | Sepsis  | Vitronectin OS=Homo sapiens GN=VTN PE=1 SV=1                                          |
| <b>MA2A1_HUMAN</b> | 0,017246 | 2,095398 | Sepsis  | Alpha-mannosidase 2 OS=Homo sapiens GN=MAN2A1 PE=1 SV=2                               |
| <b>1433Z_HUMAN</b> | 0,017304 | 9,387205 | Sepsis  | 14-3-3 protein zeta/delta OS=Homo sapiens GN=YWHAZ PE=1 SV=1                          |
| <b>THRB_HUMAN</b>  | 0,018071 | 1,567337 | Control | Prothrombin OS=Homo sapiens GN=F2 PE=1 SV=2                                           |
| <b>APOE_HUMAN</b>  | 0,018251 | 1,630123 | Sepsis  | Apolipoprotein E OS=Homo sapiens GN=APOE PE=1 SV=1                                    |
| <b>APOC3_HUMAN</b> | 0,018703 | 1,966803 | Control | Apolipoprotein C-III OS=Homo sapiens GN=APOC3 PE=1 SV=1                               |
| <b>ACTB_HUMAN</b>  | 0,019985 | 3,024146 | Sepsis  | Actin, cytoplasmic 1 OS=Homo sapiens GN=ACTB PE=1 SV=1                                |
| <b>CERU_HUMAN</b>  | 0,020195 | 1,556162 | Sepsis  | Ceruloplasmin OS=Homo sapiens GN=CP PE=1 SV=1                                         |
| <b>PZP_HUMAN</b>   | 0,020742 | 1,718804 | Control | Pregnancy zone protein OS=Homo sapiens GN=PZP PE=1 SV=4                               |
| <b>CO8A_HUMAN</b>  | 0,022202 | 1,594109 | Sepsis  | Complement component C8 alpha chain OS=Homo sapiens GN=C8A PE=1 SV=2                  |
| <b>IGHG1_HUMAN</b> | 0,022503 | 1,817149 | Control | Ig gamma-1 chain C region OS=Homo sapiens GN=IGHG1 PE=1 SV=1                          |
| <b>POSTN_HUMAN</b> | 0,023622 | 2,072017 | Sepsis  | Periostin OS=Homo sapiens GN=POSTN PE=1 SV=2                                          |
| <b>CBPN_HUMAN</b>  | 0,02621  | 2,402578 | Sepsis  | Carboxypeptidase N catalytic chain OS=Homo sapiens GN=CPN1 PE=1 SV=1                  |
| <b>APOC1_HUMAN</b> | 0,026859 | 2,093199 | Control | Apolipoprotein C-I OS=Homo sapiens GN=APOC1 PE=1 SV=1                                 |
| <b>1433E_HUMAN</b> | 0,027517 | 8,148971 | Sepsis  | 14-3-3 protein epsilon OS=Homo sapiens GN=YWHA E PE=1 SV=1                            |

|             |          |          |         |                                                                                                            |
|-------------|----------|----------|---------|------------------------------------------------------------------------------------------------------------|
| LDHA_HUMAN  | 0,029135 | 2,579157 | Sepsis  | L-lactate dehydrogenase A chain OS=Homo sapiens GN=LDHA PE=1 SV=2                                          |
| CD5L_HUMAN  | 0,033286 | 6,760591 | Control | CD5 antigen-like OS=Homo sapiens GN=CD5L PE=1 SV=1                                                         |
| CNDP1_HUMAN | 0,035048 | 1,931564 | Control | Beta-Ala-His dipeptidase OS=Homo sapiens GN=CNDP1 PE=1 SV=4                                                |
| ANT3_HUMAN  | 0,035467 | 1,398621 | Sepsis  | Antithrombin-III OS=Homo sapiens GN=SERPINC1 PE=1 SV=1                                                     |
| ALDOB_HUMAN | 0,037227 | 5,740726 | Sepsis  | Fructose-bisphosphate aldolase B OS=Homo sapiens GN=ALDOB PE=1 SV=2                                        |
| CO8B_HUMAN  | 0,037467 | 1,744566 | Sepsis  | Complement component C8 beta chain OS=Homo sapiens GN=C8B PE=1 SV=3                                        |
| K2C1_HUMAN  | 0,042086 | 1,636885 | Sepsis  | Keratin, type II cytoskeletal 1 OS=Homo sapiens GN=KRT1 PE=1 SV=6                                          |
| ALS_HUMAN   | 0,044847 | 1,52681  | Control | Insulin-like growth factor-binding protein complex acid labile subunit OS=Homo sapiens GN=IGFALS PE=1 SV=1 |
| HBD_HUMAN   | 0,044995 | 2,312628 | Sepsis  | Hemoglobin subunit delta OS=Homo sapiens GN=HBD PE=1 SV=2                                                  |
| THBG_HUMAN  | 0,046199 | 1,28132  | Sepsis  | Thyroxine-binding globulin OS=Homo sapiens GN=SERPINA7 PE=1 SV=2                                           |
| FA10_HUMAN  | 0,047034 | 1,488008 | Sepsis  | Coagulation factor X OS=Homo sapiens GN=F10 PE=1 SV=2                                                      |
| DTNB_HUMAN  | 0,047476 | 4,614486 | Sepsis  | Dystrobrein beta OS=Homo sapiens GN=DTNB PE=1 SV=1                                                         |
| FGL2_HUMAN  | 0,049873 | 8,351645 | Sepsis  | Fibroleukin OS=Homo sapiens GN=FGL2 PE=1 SV=1                                                              |
| AFAM_HUMAN  | 0,050126 | 1,560145 | Control | Afamin OS=Homo sapiens GN=AFM PE=1 SV=1                                                                    |
| A1AG2_HUMAN | 0,05026  | 2,118009 | Sepsis  | Alpha-1-acid glycoprotein 2 OS=Homo sapiens GN=ORM2 PE=1 SV=2                                              |
| F16P1_HUMAN | 0,05665  | 6,770231 | Sepsis  | Fructose-1,6-bisphosphatase 1 OS=Homo sapiens GN=FBP1 PE=1 SV=5                                            |
| FSTL1_HUMAN | 0,057937 | 6,669486 | Sepsis  | Follistatin-related protein 1 OS=Homo sapiens GN=FSTL1 PE=1 SV=1                                           |
| CCD96_HUMAN | 0,065813 | 2,655555 | Control | Coiled-coil domain-containing protein 96 OS=Homo sapiens GN=CCDC96 PE=2 SV=2                               |
| GP1BA_HUMAN | 0,067618 | 2,365948 | Sepsis  | Platelet glycoprotein Ib alpha chain OS=Homo sapiens GN=GP1BA PE=1 SV=2                                    |
| PON1_HUMAN  | 0,068853 | 1,502476 | Control | Serum paraoxonase/arylesterase 1 OS=Homo sapiens GN=PON1 PE=1 SV=3                                         |
| PRG4_HUMAN  | 0,070107 | 1,44814  | Sepsis  | Proteoglycan 4 OS=Homo sapiens GN=PRG4 PE=1 SV=2                                                           |
| VCAM1_HUMAN | 0,073323 | 2,159888 | Sepsis  | Vascular cell adhesion protein 1 OS=Homo sapiens GN=VCAM1 PE=1 SV=1                                        |
| ACTA_HUMAN  | 0,075046 | 2,700992 | Sepsis  | Actin, aortic smooth muscle OS=Homo sapiens GN=ACTA2 PE=1 SV=1                                             |
| CFAI_HUMAN  | 0,077141 | 1,294569 | Sepsis  | Complement factor I OS=Homo sapiens GN=CFI PE=1 SV=2                                                       |
| H4_HUMAN    | 0,077784 | 2,759513 | Sepsis  | Histone H4 OS=Homo sapiens GN=HIST1H4A PE=1 SV=2                                                           |
| C1R_HUMAN   | 0,082565 | 1,23538  | Sepsis  | Complement C1r subcomponent OS=Homo sapiens GN=C1R PE=1 SV=2                                               |
| VWF_HUMAN   | 0,083475 | 2,0697   | Sepsis  | von Willebrand factor OS=Homo sapiens GN=VWF PE=1 SV=4                                                     |
| ITIH1_HUMAN | 0,08811  | 1,390222 | Control | Inter-alpha-trypsin inhibitor heavy chain H1 OS=Homo sapiens GN=ITIH1 PE=1 SV=3                            |
| TKT_HUMAN   | 0,089545 | 11,64935 | Sepsis  | Transketolase OS=Homo sapiens GN=TKT PE=1 SV=3                                                             |
| A1BG_HUMAN  | 0,09008  | 1,277178 | Sepsis  | Alpha-1B-glycoprotein OS=Homo sapiens GN=A1BG PE=1 SV=4                                                    |
| PGRP2_HUMAN | 0,093453 | 1,388755 | Control | N-acetylmuramoyl-L-alanine amidase OS=Homo sapiens GN=PGLYRP2 PE=1 SV=1                                    |
| ALBU_HUMAN  | 0,096322 | 1,450043 | Control | Serum albumin OS=Homo sapiens GN=ALB PE=1 SV=2                                                             |
| FIBA_HUMAN  | 0,096837 | 3,957184 | Sepsis  | Fibrinogen alpha chain OS=Homo sapiens GN=FGA PE=1 SV=2                                                    |
| IGHM_HUMAN  | 0,097637 | 2,408566 | Control | Ig mu chain C region OS=Homo sapiens GN=IGHM PE=1 SV=3                                                     |
| SEPP1_HUMAN | 0,098397 | 1,605897 | Control | Selenoprotein P OS=Homo sapiens GN=SEPP1 PE=1 SV=3                                                         |
| CO7_HUMAN   | 0,102856 | 1,343926 | Sepsis  | Complement component C7 OS=Homo sapiens GN=C7 PE=1 SV=2                                                    |
| IGHG3_HUMAN | 0,105844 | 1,461314 | Control | Ig gamma-3 chain C region OS=Homo sapiens GN=IGHG3 PE=1 SV=2                                               |
| CFAH_HUMAN  | 0,117323 | 1,17083  | Control | Complement factor H OS=Homo sapiens GN=CFH PE=1 SV=4                                                       |
| KNG1_HUMAN  | 0,118254 | 1,182542 | Control | Kininogen-1 OS=Homo sapiens GN=KNG1 PE=1 SV=2                                                              |
| FCN2_HUMAN  | 0,12061  | 1,325857 | Sepsis  | Ficolin-2 OS=Homo sapiens GN=FCN2 PE=1 SV=2                                                                |
| PHLD_HUMAN  | 0,126622 | 1,552526 | Control | Phosphatidylinositol-glycan-specific phospholipase D OS=Homo sapiens GN=GPLD1 PE=1 SV=3                    |

|             |          |          |         |                                                                                                |
|-------------|----------|----------|---------|------------------------------------------------------------------------------------------------|
| CO4A_HUMAN  | 0,126627 | 1,61536  | Sepsis  | Complement C4-A OS=Homo sapiens GN=C4A PE=1 SV=2                                               |
| A2MG_HUMAN  | 0,129819 | 1,505018 | Control | Alpha-2-macroglobulin OS=Homo sapiens GN=A2M PE=1 SV=3                                         |
| IGKC_HUMAN  | 0,13049  | 1,604277 | Control | Ig kappa chain C region OS=Homo sapiens GN=IGKC PE=1 SV=1                                      |
| HEP2_HUMAN  | 0,136914 | 1,286135 | Control | Heparin cofactor 2 OS=Homo sapiens GN=SERPIND1 PE=1 SV=3                                       |
| IGHG4_HUMAN | 0,139428 | 1,697464 | Control | Ig gamma-4 chain C region OS=Homo sapiens GN=IGHG4 PE=1 SV=1                                   |
| HRG_HUMAN   | 0,1406   | 1,327752 | Control | Histidine-rich glycoprotein OS=Homo sapiens GN=HRG PE=1 SV=1                                   |
| MASP1_HUMAN | 0,141551 | 1,319306 | Control | Mannan-binding lectin serine protease 1 OS=Homo sapiens GN=MASP1 PE=1 SV=3                     |
| TETN_HUMAN  | 0,142498 | 1,311765 | Control | Tetranectin OS=Homo sapiens GN=CLEC3B PE=1 SV=3                                                |
| K22E_HUMAN  | 0,148819 | 1,160422 | Sepsis  | Keratin, type II cytoskeletal 2 epidermal OS=Homo sapiens GN=KRT2 PE=1 SV=2                    |
| K1C10_HUMAN | 0,159637 | 4,744406 | Control | Keratin, type I cytoskeletal 10 OS=Homo sapiens GN=KRT10 PE=1 SV=6                             |
| PAR14_HUMAN | 0,181348 | 1,780101 | Control | Poly [ADP-ribose] polymerase 14 OS=Homo sapiens GN=PARP14 PE=1 SV=3                            |
| PI16_HUMAN  | 0,182408 | 1,439091 | Control | Peptidase inhibitor 16 OS=Homo sapiens GN=PI16 PE=1 SV=1                                       |
| LAC1_HUMAN  | 0,184382 | 2,438967 | Control | Ig lambda-1 chain C regions OS=Homo sapiens GN=IGLC1 PE=1 SV=1                                 |
| APOM_HUMAN  | 0,185041 | 1,413483 | Control | Apolipoprotein M OS=Homo sapiens GN=APOM PE=1 SV=2                                             |
| APOC2_HUMAN | 0,187983 | 1,749555 | Control | Apolipoprotein C-II OS=Homo sapiens GN=APOC2 PE=1 SV=1                                         |
| CRIS3_HUMAN | 0,189544 | 2,332398 | Sepsis  | Cysteine-rich secretory protein 3 OS=Homo sapiens GN=CRISP3 PE=1 SV=1                          |
| CO4B_HUMAN  | 0,202706 | 1,352425 | Sepsis  | Complement C4-B OS=Homo sapiens GN=C4B PE=1 SV=2                                               |
| APOB_HUMAN  | 0,205647 | 1,237763 | Control | Apolipoprotein B-100 OS=Homo sapiens GN=APOB PE=1 SV=2                                         |
| TSP4_HUMAN  | 0,205719 | 1,565845 | Sepsis  | Thrombospondin-4 OS=Homo sapiens GN=THBS4 PE=1 SV=2                                            |
| CO8G_HUMAN  | 0,210404 | 1,380296 | Sepsis  | Complement component C8 gamma chain OS=Homo sapiens GN=C8G PE=1 SV=3                           |
| ITIH4_HUMAN | 0,21382  | 1,270855 | Sepsis  | Inter-alpha-trypsin inhibitor heavy chain H4 OS=Homo sapiens GN=ITIH4 PE=1 SV=4                |
| CO3_HUMAN   | 0,214364 | 1,186368 | Sepsis  | Complement C3 OS=Homo sapiens GN=C3 PE=1 SV=2                                                  |
| PROS_HUMAN  | 0,223306 | 1,114071 | Control | Vitamin K-dependent protein S OS=Homo sapiens GN=PROS1 PE=1 SV=1                               |
| TITIN_HUMAN | 0,231922 | 1,375777 | Control | Titin OS=Homo sapiens GN=TTN PE=1 SV=4                                                         |
| APOC4_HUMAN | 0,246321 | 1,536393 | Control | Apolipoprotein C-IV OS=Homo sapiens GN=APOC4 PE=1 SV=1                                         |
| COMP_HUMAN  | 0,259414 | 2,060502 | Sepsis  | Cartilage oligomeric matrix protein OS=Homo sapiens GN=COMP PE=1 SV=2                          |
| IGHA1_HUMAN | 0,260265 | 1,543799 | Control | Ig alpha-1 chain C region OS=Homo sapiens GN=IGHA1 PE=1 SV=2                                   |
| CETP_HUMAN  | 0,26268  | 1,243085 | Sepsis  | Cholesteryl ester transfer protein OS=Homo sapiens GN=CETP PE=1 SV=2                           |
| PROC_HUMAN  | 0,266888 | 1,492003 | Control | Vitamin K-dependent protein C OS=Homo sapiens GN=PROC PE=1 SV=1                                |
| C1QA_HUMAN  | 0,267516 | 1,217621 | Control | Complement C1q subcomponent subunit A OS=Homo sapiens GN=C1QA PE=1 SV=2                        |
| BTD_HUMAN   | 0,268922 | 1,229848 | Control | Biotinidase OS=Homo sapiens GN=BTD PE=1 SV=2                                                   |
| A1AT_HUMAN  | 0,27802  | 2,002863 | Sepsis  | Alpha-1-antitrypsin OS=Homo sapiens GN=SERPINA1 PE=1 SV=3                                      |
| NCAM1_HUMAN | 0,288012 | 1,349632 | Sepsis  | Neural cell adhesion molecule 1 OS=Homo sapiens GN=NCAM1 PE=1 SV=3                             |
| ECM1_HUMAN  | 0,293942 | 1,153504 | Control | Extracellular matrix protein 1 OS=Homo sapiens GN=ECM1 PE=1 SV=2                               |
| NEO1_HUMAN  | 0,29624  | 2,596158 | Sepsis  | Neogenin OS=Homo sapiens GN=NEO1 PE=1 SV=2                                                     |
| HEMO_HUMAN  | 0,305632 | 1,400067 | Sepsis  | Hemopexin OS=Homo sapiens GN=HPX PE=1 SV=2                                                     |
| C4BPA_HUMAN | 0,306308 | 1,172551 | Control | C4b-binding protein alpha chain OS=Homo sapiens GN=C4BPA PE=1 SV=2                             |
| LV302_HUMAN | 0,307849 | 1,453624 | Sepsis  | Ig lambda chain V-III region LOI OS=Homo sapiens PE=1 SV=1                                     |
| LG3BP_HUMAN | 0,32362  | 1,70481  | Sepsis  | Galectin-3-binding protein OS=Homo sapiens GN=LGALS3BP PE=1 SV=1                               |
| CO6_HUMAN   | 0,325838 | 1,21449  | Sepsis  | Complement component C6 OS=Homo sapiens GN=C6 PE=1 SV=3                                        |
| ROR1_HUMAN  | 0,325897 | 1,270479 | Sepsis  | Inactive tyrosine-protein kinase transmembrane receptor ROR1 OS=Homo sapiens GN=ROR1 PE=1 SV=2 |

|             |          |          |         |                                                                                                     |
|-------------|----------|----------|---------|-----------------------------------------------------------------------------------------------------|
| LCAT_HUMAN  | 0,328385 | 1,218859 | Control | Phosphatidylcholine-sterol acyltransferase OS=Homo sapiens GN=LCAT PE=1 SV=1                        |
| FA11_HUMAN  | 0,33067  | 1,157884 | Control | Coagulation factor XI OS=Homo sapiens GN=FA11 PE=1 SV=1                                             |
| A2AP_HUMAN  | 0,332274 | 1,187337 | Control | Alpha-2-antiplasmin OS=Homo sapiens GN=SERPINF2 PE=1 SV=3                                           |
| CYTC_HUMAN  | 0,340047 | 1,114002 | Control | Cystatin-C OS=Homo sapiens GN=CST3 PE=1 SV=1                                                        |
| FBLN1_HUMAN | 0,352373 | 1,124723 | Sepsis  | Fibulin-1 OS=Homo sapiens GN=FBLN1 PE=1 SV=4                                                        |
| PEDF_HUMAN  | 0,353736 | 1,40658  | Control | Pigment epithelium-derived factor OS=Homo sapiens GN=SERPINF1 PE=1 SV=4                             |
| UGPA_HUMAN  | 0,361997 | 3,390436 | Sepsis  | UTP--glucose-1-phosphate uridylyltransferase OS=Homo sapiens GN=UGP2 PE=1 SV=5                      |
| HS90A_HUMAN | 0,366054 | 4,040204 | Sepsis  | Heat shock protein HSP 90-alpha OS=Homo sapiens GN=HSP90AA1 PE=1 SV=5                               |
| CPSM_HUMAN  | 0,376846 | 1,405912 | Sepsis  | Carbamoyl-phosphate synthase [ammonia], mitochondrial OS=Homo sapiens GN=CPS1 PE=1 SV=2             |
| APOL1_HUMAN | 0,386805 | 1,322553 | Sepsis  | Apolipoprotein L1 OS=Homo sapiens GN=APOL1 PE=1 SV=5                                                |
| C1S_HUMAN   | 0,404196 | 1,131571 | Sepsis  | Complement C1s subcomponent OS=Homo sapiens GN=C1S PE=1 SV=1                                        |
| K1C9_HUMAN  | 0,407161 | 1,526673 | Control | Keratin, type I cytoskeletal 9 OS=Homo sapiens GN=KRT9 PE=1 SV=3                                    |
| APOD_HUMAN  | 0,410439 | 1,173274 | Control | Apolipoprotein D OS=Homo sapiens GN=APOD PE=1 SV=1                                                  |
| AL1A1_HUMAN | 0,415011 | 1,562186 | Control | Retinal dehydrogenase 1 OS=Homo sapiens GN=ALDH1A1 PE=1 SV=2                                        |
| CAMP_HUMAN  | 0,421037 | 3,167403 | Sepsis  | Cathelicidin antimicrobial peptide OS=Homo sapiens GN=CAMP PE=1 SV=1                                |
| SAA4_HUMAN  | 0,429631 | 1,201277 | Sepsis  | Serum amyloid A-4 protein OS=Homo sapiens GN=SAA4 PE=1 SV=2                                         |
| FCN3_HUMAN  | 0,430777 | 1,085357 | Control | Ficolin-3 OS=Homo sapiens GN=FCN3 PE=1 SV=2                                                         |
| ANGT_HUMAN  | 0,43257  | 1,490602 | Sepsis  | Angiotensinogen OS=Homo sapiens GN=AGT PE=1 SV=1                                                    |
| CPN2_HUMAN  | 0,437329 | 1,352367 | Sepsis  | Carboxypeptidase N subunit 2 OS=Homo sapiens GN=CPN2 PE=1 SV=3                                      |
| GPV_HUMAN   | 0,438723 | 1,081818 | Control | Platelet glycoprotein V OS=Homo sapiens GN=GP5 PE=1 SV=1                                            |
| C1QB_HUMAN  | 0,444358 | 1,113417 | Control | Complement C1q subcomponent subunit B OS=Homo sapiens GN=C1QB PE=1 SV=3                             |
| CBG_HUMAN   | 0,446433 | 1,194661 | Sepsis  | Corticosteroid-binding globulin OS=Homo sapiens GN=SERPINA6 PE=1 SV=1                               |
| HGFA_HUMAN  | 0,487204 | 1,125065 | Control | Hepatocyte growth factor activator OS=Homo sapiens GN=HGFA PE=1 SV=1                                |
| SCO1_HUMAN  | 0,491286 | 1,075056 | Control | Protein SCO1 homolog, mitochondrial OS=Homo sapiens GN=SCO1 PE=1 SV=1                               |
| C1QC_HUMAN  | 0,494626 | 1,188945 | Control | Complement C1q subcomponent subunit C OS=Homo sapiens GN=C1QC PE=1 SV=3                             |
| ENPP2_HUMAN | 0,503444 | 2,148557 | Control | Ectonucleotide pyrophosphatase/phosphodiesterase family member 2 OS=Homo sapiens GN=ENPP2 PE=1 SV=3 |
| FHR1_HUMAN  | 0,511048 | 1,112857 | Control | Complement factor H-related protein 1 OS=Homo sapiens GN=CFHR1 PE=1 SV=2                            |
| C4BPB_HUMAN | 0,518113 | 1,069712 | Sepsis  | C4b-binding protein beta chain OS=Homo sapiens GN=C4BPB PE=1 SV=1                                   |
| THAP4_HUMAN | 0,527682 | 1,283514 | Sepsis  | THAP domain-containing protein 4 OS=Homo sapiens GN=THAP4 PE=1 SV=2                                 |
| LYSC_HUMAN  | 0,531896 | 2,324872 | Sepsis  | Lysozyme C OS=Homo sapiens GN=LYZ PE=1 SV=1                                                         |
| TSP1_HUMAN  | 0,539938 | 1,094635 | Control | Thrombospondin-1 OS=Homo sapiens GN=THBS1 PE=1 SV=2                                                 |
| C163A_HUMAN | 0,540824 | 1,308847 | Sepsis  | Scavenger receptor cysteine-rich type 1 protein M130 OS=Homo sapiens GN=CD163 PE=1 SV=2             |
| LYVE1_HUMAN | 0,558105 | 1,209595 | Sepsis  | Lymphatic vessel endothelial hyaluronic acid receptor 1 OS=Homo sapiens GN=LYVE1 PE=1 SV=2          |
| APOA_HUMAN  | 0,560954 | 2,112056 | Sepsis  | Apolipoprotein(a) OS=Homo sapiens GN=LPA PE=1 SV=1                                                  |
| NCHL1_HUMAN | 0,56204  | 1,160829 | Control | Neural cell adhesion molecule L1-like protein OS=Homo sapiens GN=CHL1 PE=1 SV=4                     |
| TENX_HUMAN  | 0,565089 | 2,372156 | Sepsis  | Tenascin-X OS=Homo sapiens GN=TNXB PE=1 SV=4                                                        |
| PLTP_HUMAN  | 0,58202  | 1,384861 | Sepsis  | Phospholipid transfer protein OS=Homo sapiens GN=PLTP PE=1 SV=1                                     |
| FA9_HUMAN   | 0,58833  | 1,023277 | Sepsis  | Coagulation factor IX OS=Homo sapiens GN=F9 PE=1 SV=2                                               |
| GELS_HUMAN  | 0,606981 | 1,063752 | Control | Gelsolin OS=Homo sapiens GN=GSN PE=1 SV=1                                                           |
| MBL2_HUMAN  | 0,626464 | 1,114724 | Sepsis  | Mannose-binding protein C OS=Homo sapiens GN=MBL2 PE=1 SV=2                                         |

|             |          |          |         |                                                                                                |
|-------------|----------|----------|---------|------------------------------------------------------------------------------------------------|
| PROF1_HUMAN | 0,630268 | 1,16822  | Sepsis  | Profilin-1 OS=Homo sapiens GN=PFN1 PE=1 SV=2                                                   |
| CXCL7_HUMAN | 0,651884 | 1,042647 | Control | Platelet basic protein OS=Homo sapiens GN=PPBP PE=1 SV=3                                       |
| GNAL_HUMAN  | 0,653712 | 53,91584 | Sepsis  | Guanine nucleotide-binding protein G(olf) subunit alpha OS=Homo sapiens GN=GNAL PE=1 SV=1      |
| FA5_HUMAN   | 0,677277 | 1,183501 | Control | Coagulation factor V OS=Homo sapiens GN=F5 PE=1 SV=4                                           |
| FETUA_HUMAN | 0,677517 | 1,100223 | Control | Alpha-2-HS-glycoprotein OS=Homo sapiens GN=AHSG PE=1 SV=1                                      |
| VTDB_HUMAN  | 0,683455 | 1,056735 | Control | Vitamin D-binding protein OS=Homo sapiens GN=GC PE=1 SV=1                                      |
| KV301_HUMAN | 0,687513 | 1,131574 | Control | Ig kappa chain V-III region B6 OS=Homo sapiens PE=1 SV=1                                       |
| SPN90_HUMAN | 0,69167  | 1,110617 | Control | NCK-interacting protein with SH3 domain OS=Homo sapiens GN=NCKIPSD PE=1 SV=1                   |
| CD44_HUMAN  | 0,698862 | 1,185821 | Sepsis  | CD44 antigen OS=Homo sapiens GN=CD44 PE=1 SV=3                                                 |
| PROP_HUMAN  | 0,699822 | 1,456781 | Sepsis  | Properdin OS=Homo sapiens GN=CFP PE=1 SV=2                                                     |
| CHLE_HUMAN  | 0,720798 | 1,092708 | Sepsis  | Cholinesterase OS=Homo sapiens GN=BCHE PE=1 SV=1                                               |
| CO5_HUMAN   | 0,726164 | 1,001785 | Control | Complement C5 OS=Homo sapiens GN=C5 PE=1 SV=4                                                  |
| MMP9_HUMAN  | 0,734534 | 1,934791 | Sepsis  | Matrix metalloproteinase-9 OS=Homo sapiens GN=MMP9 PE=1 SV=3                                   |
| AMPN_HUMAN  | 0,744489 | 1,295543 | Sepsis  | Aminopeptidase N OS=Homo sapiens GN=ANPEP PE=1 SV=4                                            |
| PF4V_HUMAN  | 0,74592  | 1,474981 | Sepsis  | Platelet factor 4 variant OS=Homo sapiens GN=PF4V1 PE=1 SV=1                                   |
| IC1_HUMAN   | 0,748187 | 1,085942 | Sepsis  | Plasma protease C1 inhibitor OS=Homo sapiens GN=SERPING1 PE=1 SV=2                             |
| FCG3B_HUMAN | 0,758483 | 4,847661 | Sepsis  | Low affinity immunoglobulin gamma Fc region receptor III-B OS=Homo sapiens GN=FCGR3B PE=1 SV=2 |
| APOA2_HUMAN | 0,768877 | 1,011682 | Control | Apolipoprotein A-II OS=Homo sapiens GN=APOA2 PE=1 SV=1                                         |
| ADCY9_HUMAN | 0,791803 | 1,001436 | Sepsis  | Adenylate cyclase type 9 OS=Homo sapiens GN=ADCY9 PE=1 SV=4                                    |
| CCNT2_HUMAN | 0,802259 | 1,019297 | Control | Cyclin-T2 OS=Homo sapiens GN=CCNT2 PE=1 SV=2                                                   |
| LUM_HUMAN   | 0,818024 | 1,013299 | Control | Lumican OS=Homo sapiens GN=LUM PE=1 SV=2                                                       |
| MMP2_HUMAN  | 0,840501 | 1,187508 | Sepsis  | 72 kDa type IV collagenase OS=Homo sapiens GN=MMP2 PE=1 SV=2                                   |
| C1RL_HUMAN  | 0,853469 | 1,021289 | Control | Complement C1r subcomponent-like protein OS=Homo sapiens GN=C1RL PE=1 SV=2                     |
| FBLN3_HUMAN | 0,853607 | 1,072444 | Sepsis  | EGF-containing fibulin-like extracellular matrix protein 1 OS=Homo sapiens GN=EFEMP1 PE=1 SV=2 |
| CO2_HUMAN   | 0,870777 | 1,082154 | Sepsis  | Complement C2 OS=Homo sapiens GN=C2 PE=1 SV=2                                                  |
| ZA2G_HUMAN  | 0,889758 | 1,017049 | Sepsis  | Zinc-alpha-2-glycoprotein OS=Homo sapiens GN=AZGP1 PE=1 SV=2                                   |
| SAMP_HUMAN  | 0,907149 | 1,072198 | Control | Serum amyloid P-component OS=Homo sapiens GN=APCS PE=1 SV=2                                    |
| PROZ_HUMAN  | 0,960429 | 1,923432 | Control | Vitamin K-dependent protein Z OS=Homo sapiens GN=PROZ PE=1 SV=2                                |
| ATRN_HUMAN  | 0,970548 | 1,028294 | Sepsis  | Attractin OS=Homo sapiens GN=ATRN PE=1 SV=2                                                    |
| ZSC29_HUMAN | 0,970879 | 1,32036  | Sepsis  | Zinc finger and SCAN domain-containing protein 29 OS=Homo sapiens GN=ZSCAN29 PE=1 SV=2         |
| LDHB_HUMAN  | 0,988792 | 1,184816 | Control | L-lactate dehydrogenase B chain OS=Homo sapiens GN=LDHB PE=1 SV=2                              |
| MED23_HUMAN |          |          | ---     | Mediator of RNA polymerase II transcription subunit 23 OS=Homo sapiens GN=MED23 PE=1 SV=2      |

Table S2. Proteins identified with at least two peptides and an ANOVA p-value  $\leq 0.05$  and a ratio $>2$  in either direction.

| Accession   | Anova (p) | Max fold change | Highest mean condition | Description                                                                     |
|-------------|-----------|-----------------|------------------------|---------------------------------------------------------------------------------|
| LBP_HUMAN   | 2,60E-09  | 29,31263        | Sepsis                 | Lipopolysaccharide-binding protein OS=Homo sapiens GN=LBP PE=1 SV=3             |
| A2GL_HUMAN  | 3,20E-08  | 4,426432        | Sepsis                 | Leucine-rich alpha-2-glycoprotein OS=Homo sapiens GN=LRG1 PE=1 SV=2             |
| CRP_HUMAN   | 8,14E-08  | 30,41798        | Sepsis                 | C-reactive protein OS=Homo sapiens GN=CRP PE=1 SV=1                             |
| SAA2_HUMAN  | 7,47E-07  | 84,27766        | Sepsis                 | Serum amyloid A-2 protein OS=Homo sapiens GN=SAA2 PE=1 SV=1                     |
| IPSP_HUMAN  | 1,21E-06  | 5,010882        | Control                | Plasma serine protease inhibitor OS=Homo sapiens GN=SERPINA5 PE=1 SV=3          |
| FINC_HUMAN  | 9,13E-06  | 8,758802        | Control                | Fibronectin OS=Homo sapiens GN=FN1 PE=1 SV=4                                    |
| HBB_HUMAN   | 1,11E-05  | 25,27837        | Sepsis                 | Hemoglobin subunit beta OS=Homo sapiens GN=HBB PE=1 SV=2                        |
| AACT_HUMAN  | 1,88E-05  | 5,283651        | Sepsis                 | Alpha-1-antichymotrypsin OS=Homo sapiens GN=SERPINA3 PE=1 SV=2                  |
| SAA1_HUMAN  | 2,97E-05  | 76,09709        | Sepsis                 | Serum amyloid A-1 protein OS=Homo sapiens GN=SAA1 PE=1 SV=1                     |
| HBA_HUMAN   | 3,78E-05  | 16,39969        | Sepsis                 | Hemoglobin subunit alpha OS=Homo sapiens GN=HBA1 PE=1 SV=2                      |
| CATA_HUMAN  | 5,92E-05  | 7,286451        | Sepsis                 | Catalase OS=Homo sapiens GN=CAT PE=1 SV=3                                       |
| HABP2_HUMAN | 0,0001    | 2,179075        | Control                | Hyaluronan-binding protein 2 OS=Homo sapiens GN=HABP2 PE=1 SV=1                 |
| TTHY_HUMAN  | 0,0002    | 2,365905        | Control                | Transthyretin OS=Homo sapiens GN=TTR PE=1 SV=1                                  |
| CAH1_HUMAN  | 0,0002    | 8,950114        | Sepsis                 | Carbonic anhydrase 1 OS=Homo sapiens GN=CA1 PE=1 SV=2                           |
| CFAB_HUMAN  | 0,0003    | 2,048895        | Sepsis                 | Complement factor B OS=Homo sapiens GN=CFB PE=1 SV=2                            |
| LYAM1_HUMAN | 0,0004    | 2,675523        | Sepsis                 | L-selectin OS=Homo sapiens GN=SELL PE=1 SV=2                                    |
| NGAL_HUMAN  | 0,0005    | 7,169257        | Sepsis                 | Neutrophil gelatinase-associated lipocalin OS=Homo sapiens GN=LCN2 PE=1 SV=2    |
| B2MG_HUMAN  | 0,0007    | 3,486171        | Sepsis                 | Beta-2-microglobulin OS=Homo sapiens GN=B2M PE=1 SV=1                           |
| FA12_HUMAN  | 0,0008    | 3,237085        | Control                | Coagulation factor XII OS=Homo sapiens GN=F12 PE=1 SV=3                         |
| CD14_HUMAN  | 0,0008    | 2,784851        | Sepsis                 | Monocyte differentiation antigen CD14 OS=Homo sapiens GN=CD14 PE=1 SV=2         |
| FIBG_HUMAN  | 0,0009    | 5,317049        | Sepsis                 | Fibrinogen gamma chain OS=Homo sapiens GN=FGG PE=1 SV=3                         |
| TRFL_HUMAN  | 0,0011    | 9,346009        | Sepsis                 | Lactotransferrin OS=Homo sapiens GN=LTF PE=1 SV=6                               |
| ITIH3_HUMAN | 0,0012    | 2,192084        | Sepsis                 | Inter-alpha-trypsin inhibitor heavy chain H3 OS=Homo sapiens GN=ITIH3 PE=1 SV=2 |
| PRDX2_HUMAN | 0,0018    | 7,267809        | Sepsis                 | Peroxiredoxin-2 OS=Homo sapiens GN=PRDX2 PE=1 SV=5                              |
| A1AG1_HUMAN | 0,0020    | 2,94118         | Sepsis                 | Alpha-1-acid glycoprotein 1 OS=Homo sapiens GN=ORM1 PE=1 SV=1                   |
| FIBB_HUMAN  | 0,0021    | 7,926361        | Sepsis                 | Fibrinogen beta chain OS=Homo sapiens GN=FGB PE=1 SV=2                          |
| APOA4_HUMAN | 0,0022    | 3,062538        | Control                | Apolipoprotein A-IV OS=Homo sapiens GN=APOA4 PE=1 SV=3                          |
| RET4_HUMAN  | 0,0023    | 2,804231        | Control                | Retinol-binding protein 4 OS=Homo sapiens GN=RBP4 PE=1 SV=3                     |
| PLMN_HUMAN  | 0,0024    | 2,124858        | Control                | Plasminogen OS=Homo sapiens GN=PLG PE=1 SV=2                                    |
| SHBG_HUMAN  | 0,0048    | 2,27438         | Sepsis                 | Sex hormone-binding globulin OS=Homo sapiens GN=SHBG PE=1 SV=2                  |
| SPRC_HUMAN  | 0,0057    | 2,146585        | Control                | SPARC OS=Homo sapiens GN=SPARC PE=1 SV=1                                        |
| FETUB_HUMAN | 0,0078    | 2,061183        | Control                | Fetuin-B OS=Homo sapiens GN=FETUB PE=1 SV=2                                     |

|             |        |          |         |                                                                                    |
|-------------|--------|----------|---------|------------------------------------------------------------------------------------|
| HPT_HUMAN   | 0,0080 | 9,390239 | Sepsis  | Haptoglobin OS=Homo sapiens GN=HP PE=1 SV=1                                        |
| PTX3_HUMAN  | 0,0084 | 8,831504 | Sepsis  | Pentraxin-related protein PTX3 OS=Homo sapiens GN=PTX3 PE=1 SV=3                   |
| 6PGD_HUMAN  | 0,0085 | 3,129853 | Sepsis  | 6-phosphogluconate dehydrogenase, decarboxylating OS=Homo sapiens GN=PGD PE=1 SV=3 |
| ZPI_HUMAN   | 0,0112 | 2,79504  | Sepsis  | Protein Z-dependent protease inhibitor OS=Homo sapiens GN=SERPINA10 PE=1 SV=1      |
| PLSL_HUMAN  | 0,0168 | 2,812893 | Sepsis  | Plastin-2 OS=Homo sapiens GN=LCP1 PE=1 SV=6                                        |
| ACTB_HUMAN  | 0,0199 | 3,024146 | Sepsis  | Actin, cytoplasmic 1 OS=Homo sapiens GN=ACTB PE=1 SV=1                             |
| POSTN_HUMAN | 0,0236 | 2,072017 | Sepsis  | Periostin OS=Homo sapiens GN=POSTN PE=1 SV=2                                       |
| CBPN_HUMAN  | 0,0262 | 2,402578 | Sepsis  | Carboxypeptidase N catalytic chain OS=Homo sapiens GN=CPN1 PE=1 SV=1               |
| APOC1_HUMAN | 0,0268 | 2,093199 | Control | Apolipoprotein C-I OS=Homo sapiens GN=APOC1 PE=1 SV=1                              |
| LDHA_HUMAN  | 0,0291 | 2,579157 | Sepsis  | L-lactate dehydrogenase A chain OS=Homo sapiens GN=LDHA PE=1 SV=2                  |
| CD5L_HUMAN  | 0,0332 | 6,760591 | Control | CD5 antigen-like OS=Homo sapiens GN=CD5L PE=1 SV=1                                 |
| ALDOB_HUMAN | 0,0372 | 5,740726 | Sepsis  | Fructose-bisphosphate aldolase B OS=Homo sapiens GN=ALDOB PE=1 SV=2                |
